# Supplementary material for: Synthesis of tellurium nanotubes via a green approach for detection and removal of mercury ions
Source: Royal Society of Chemistry journal article supplement (doi:10.1039/c3ra41824c), 2013-01-01
Supplement: c3ra41824c.pdf [file c3ra41824c.pdf]

## Supporting Information

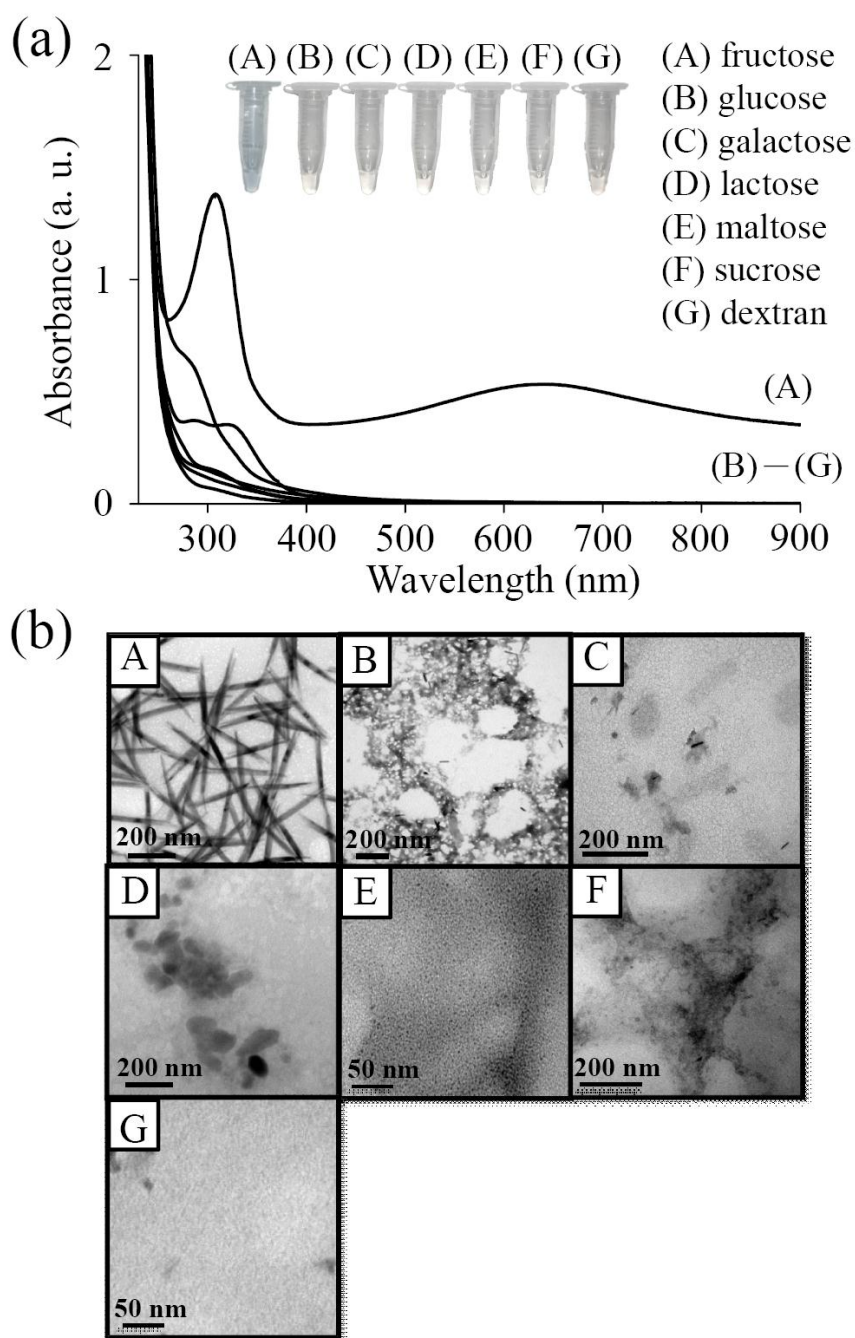

**Fig. S1.** (a) UV-Vis absorption spectra and (b) TEM images of Te nanomaterials synthesized under the various saccharides-mediated reduction reactions by (A) fructose, (B) glucose, (C) galactose, (D) lactose, (E) maltose, (F) sucrose, and (G) dextran. Te nanomaterials were obtained from the reaction of 3.13 mM  $\text{TeO}_2$  and 1.0 M saccharide in 10 mM NaOH at 60 °C for 5 min. Other conditions are the same as those described in Figure 1.

(a)

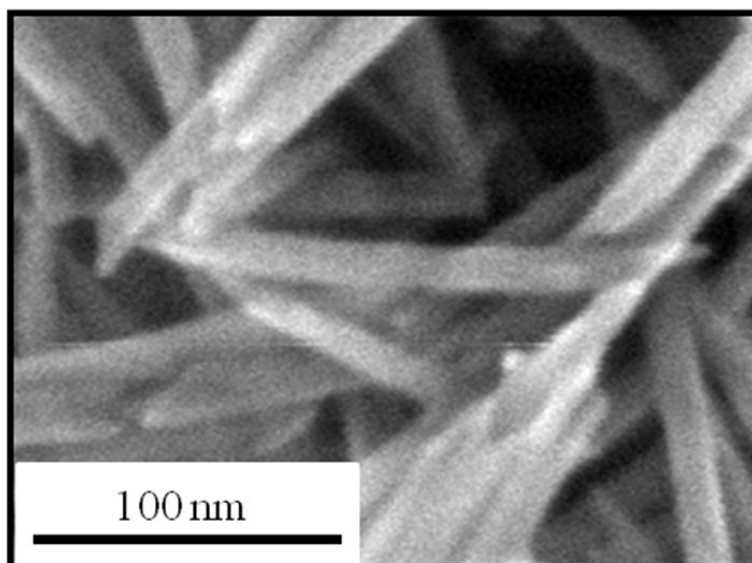

(b)

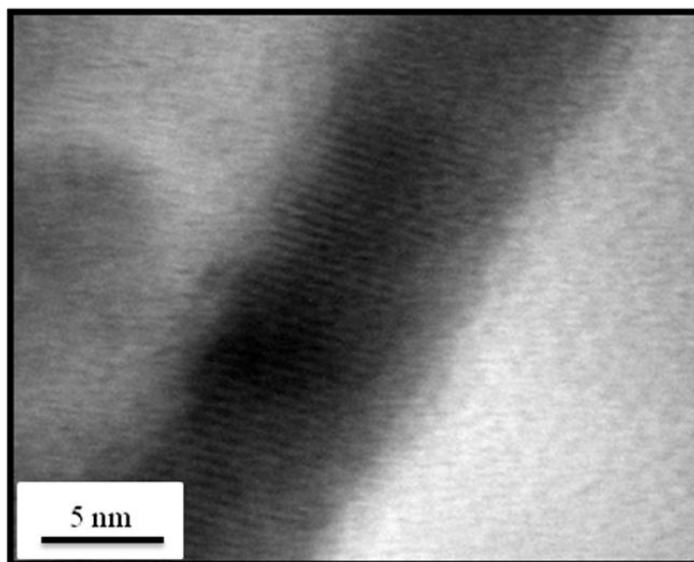

**Fig. S2.** Representative (a) SEM image and (b) HRTEM of Te NTs obtained from a reaction time of 5 min by 3.13 mM  $\text{TeO}_2$  and 1.0 M fructose in 10 mM NaOH at 60 °C. Other conditions are the same as those described in Figure 1.

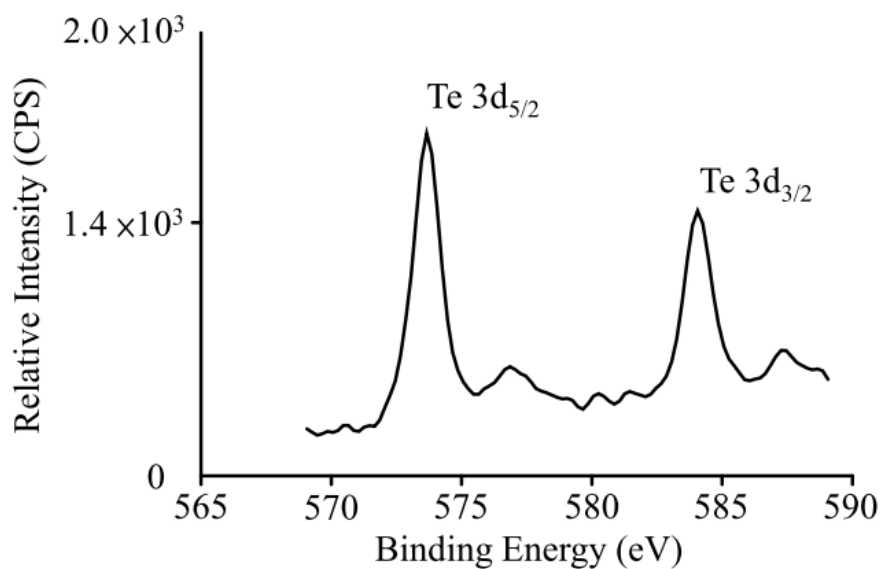

**Fig. S3.** XPS spectrum of as-prepared Te NTs. The purified Te NTs was dosed onto silicon substrates and the surface properties measured at room temperature. BE (285.3 eV) of the alkyl chain C1s orbital was used as an internal reference. Other conditions are the same as those described in Figure 1.

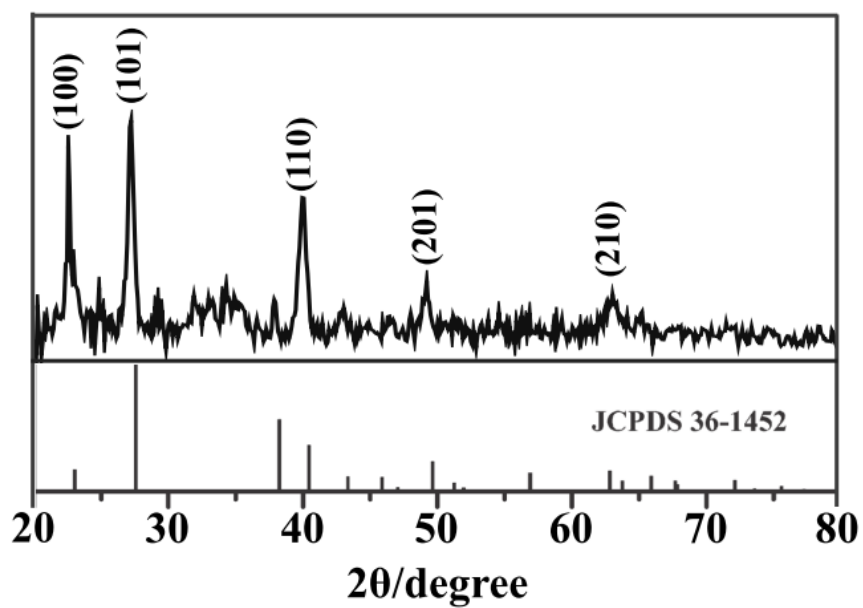

**Fig. S4.** XRD spectra of as-prepared Te NTs. Other conditions are the same as those described in Figure 1.

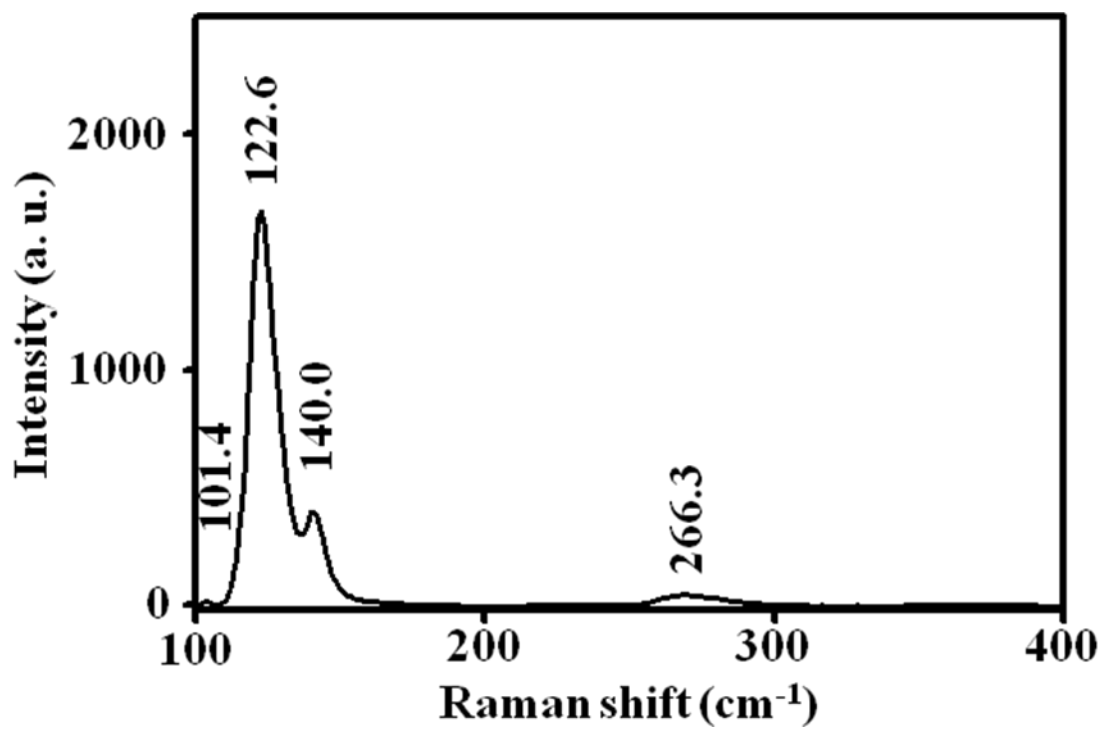

**Fig. S5.** Raman scattering spectrum of as-prepared Te NTs.

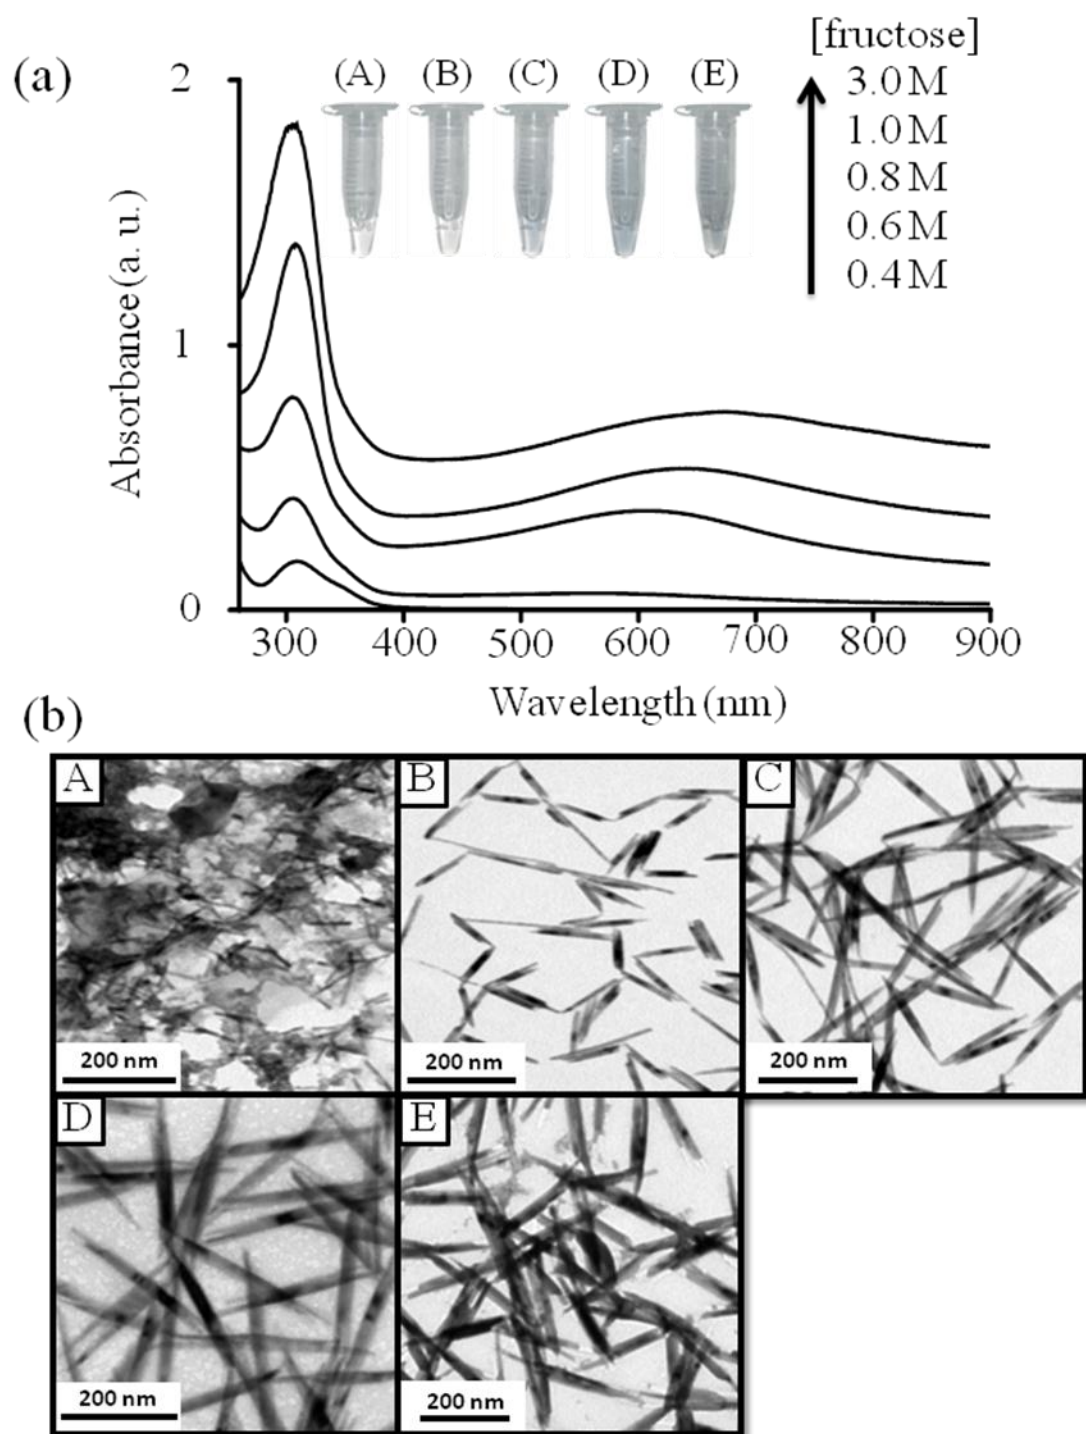

**Fig. S6.** (a) UV-Vis absorption spectra and (b) TEM images of Te NTs synthesized by (A) 0.4 M, (B) 0.6 M, (C) 0.8 M, (D) 1.0 M, and (E) 3.0 M fructose and 3.13 mM  $\text{TeO}_2$  in 10 mM NaOH after reaction at 60 °C for 5 min. Other conditions are the same as those described in Figure 1.

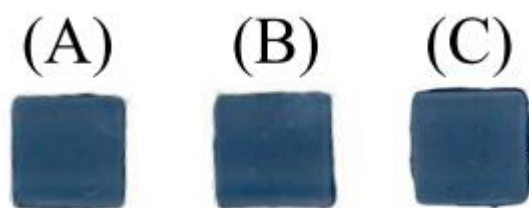

**Fig. S7.** Photographic images of (A) as-prepared Te NTs-AGM and (B, C) after incubated in (B) 200 mM NaCl solution and (C) 5.0 mM sodium phosphate (pH 7.0) at 80 °C for 2 h.

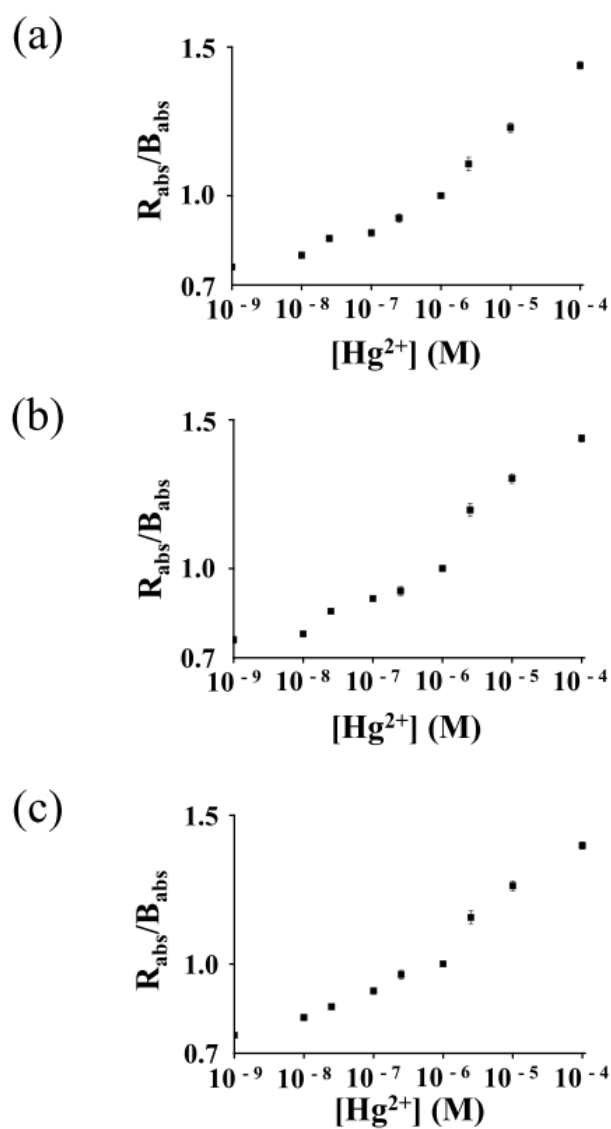

**Fig. S8.** Analyses of representative samples of (a) tap water, (b) stream water, and (c) sea water samples using Te NTs–AGM probes for  $\text{Hg}^{2+}$  detection. Diluted (two fold) water samples were spiked with  $\text{Hg}^{2+}$  (0–100  $\mu\text{M}$ ). Other conditions are the same as those described in Figure 4.
